# Supplementary material for: Anti-Cancer Effects of Zotarolimus Combined with 5-Fluorouracil Treatment in HCT-116 Colorectal Cancer-Bearing BALB/c Nude Mice
Source: MDPI journal article supplement (doi:10.3390/molecules26154683), 2021-08-02
Supplement: s1 [file s1]

Supplementary materials

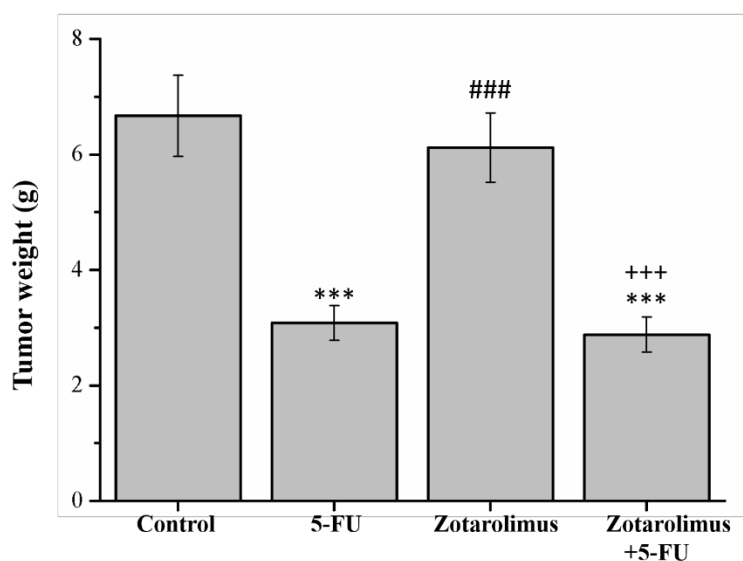

**Figure S1.** Tumor weight in BALB/cByJNarl mice post-sacrifice, measured after mice were administered different treatments, including control, 5-FU (50 mg/kg/week), zotarolimus (1 mg/kg/day), and zotarolimus (1 mg/kg/day) combined with 5-FU (50 mg/kg/week). All data are mean  $\pm$  standard deviation,  $n = 8$  per group. \*\*\* $p < 0.001$  compared with the control group. ### $p < 0.001$  compared with the 5-FU-treated group. +++ $p < 0.001$  compared with the zotarolimus-treated group.

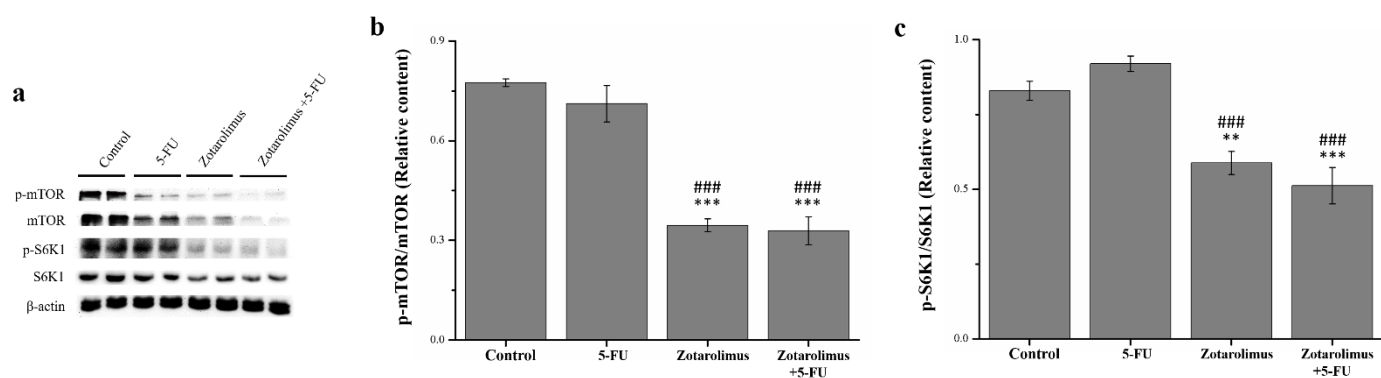

**Figure S2.** Western blot analysis of (a) mTOR signaling and relative quantitative expression of (b) mTOR phosphorylation and (c) S6K1 phosphorylation in HCT-116 tumors taken from BALB/cByJNarl mice administered different treatments, including control, 5-FU (50 mg/kg/week), zotarolimus (2 mg/kg/day), and a combination of zotarolimus (2 mg/kg/day) and 5-FU (50 mg/kg/week). All data are presented as mean  $\pm$  standard deviation,  $n = 8$  per group. \* $p < 0.05$ , \*\* $p < 0.01$ , and \*\*\* $p < 0.001$  compared with the control group. ## $p < 0.01$  and ### $p < 0.001$  compared with the 5-FU-treated group. + $p < 0.01$  compared with the zotarolimus-treated group.

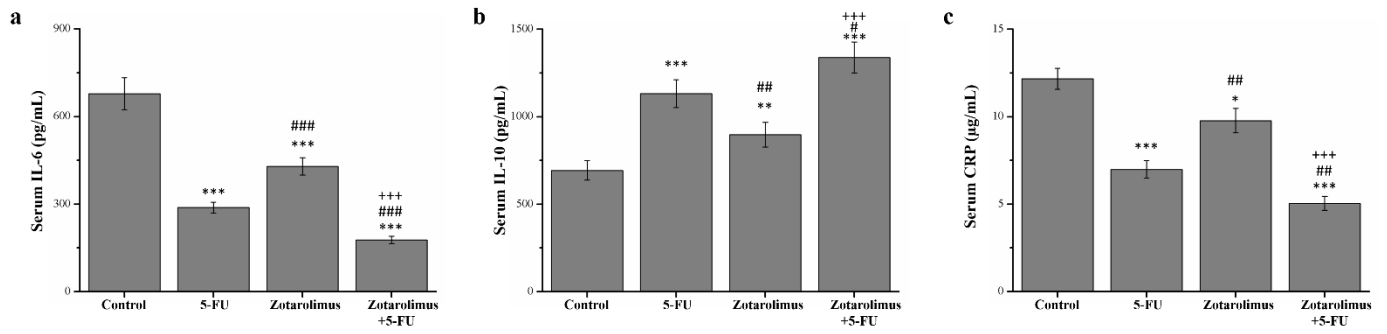

**Figure S3.** Changes in serum levels of (a) IL-6, (b) IL-10, and (c) CRP measured in BALB/cByJNarl mice administered different treatments, including control, 5-FU (50 mg/kg/week), zotarolimus (2 mg/kg/day), and a combination of zotarolimus (2 mg/kg/day) and 5-FU (50 mg/kg/week). All data are presented as mean  $\pm$  standard deviation,  $n = 8$  per group. \* $p < 0.05$ , \*\* $p < 0.01$ , and \*\*\* $p < 0.001$  compared with the control group. # $p < 0.05$ , ## $p < 0.01$ , and ### $p < 0.001$  compared with the 5-FU group. +++ $p < 0.001$  compared with the zotarolimus group.

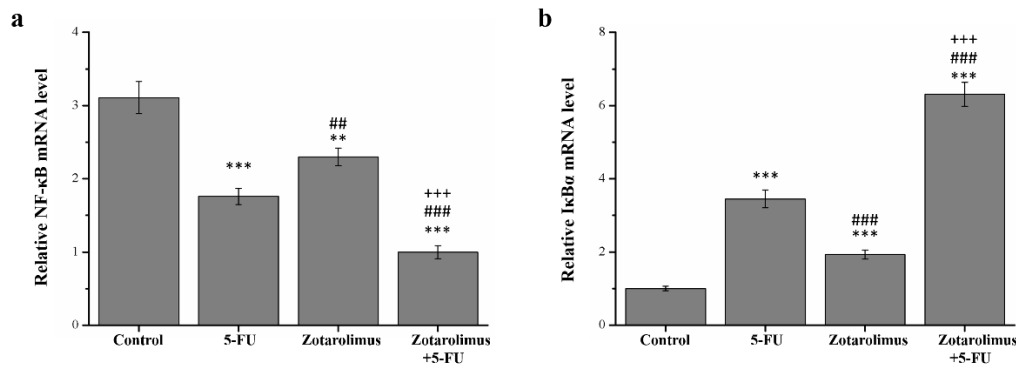

**Figure S4.** Relative gene mRNA expression of (a) *NF-κB* and (b) *IκBα* using quantitative PCR. All experiments were conducted on the HCT-116 tumor masses from BALB/cByJNarl mice administered different treatments, including control, 5-FU (50 mg/kg/week), zotarolimus (2 mg/kg/day), and a combination of zotarolimus (2 mg/kg/day) and 5-FU (50 mg/kg/week). All data are presented as mean  $\pm$  standard deviation, n = 8 per group. \*\* $p$  < 0.01 and \*\*\* $p$  < 0.001 compared with the control group. ## $p$  < 0.01 and ### $p$  < 0.001 compared with the 5-FU group. +++ $p$  < 0.001 compared with the zotarolimus group.

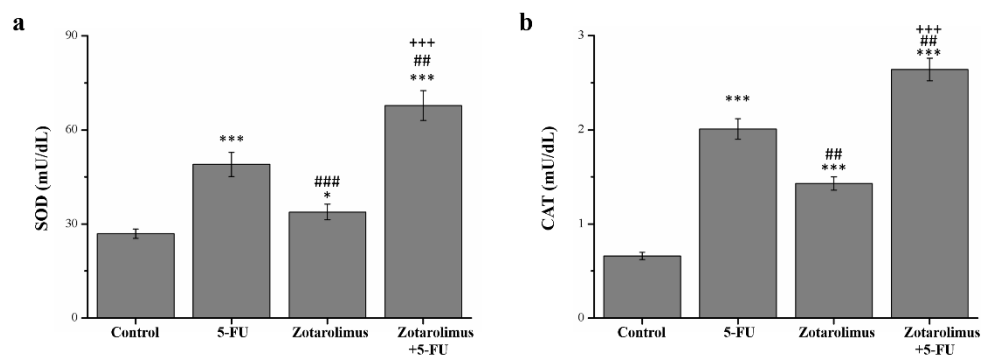

**Figure S5.** Serum level changes in (a) SOD and (b) CAT measured in BALB/cByJNarl mice administered different treatments, including control, 5-FU (50 mg/kg/week), zotarolimus (2 mg/kg/day), and a combination of zotarolimus (2 mg/kg/day) and 5-FU (50 mg/kg/week). All data are shown as mean  $\pm$  standard deviation,  $n = 8$  per group. \* $p < 0.05$  and \*\*\* $p < 0.001$  compared with the control group. # $p < 0.05$ , ## $p < 0.01$ , and ### $p < 0.001$  compared with 5-FU group. +++ $p < 0.001$  compared with zotarolimus group.
